# Supplementary material
Source: Research Square preprint supplement (doi:10.21203/rs.3.rs-9436494/v1)
Supplement: Supplementary file 1 [file bb3683fd2599623357c10e4b.docx]

## **Supporting Information**


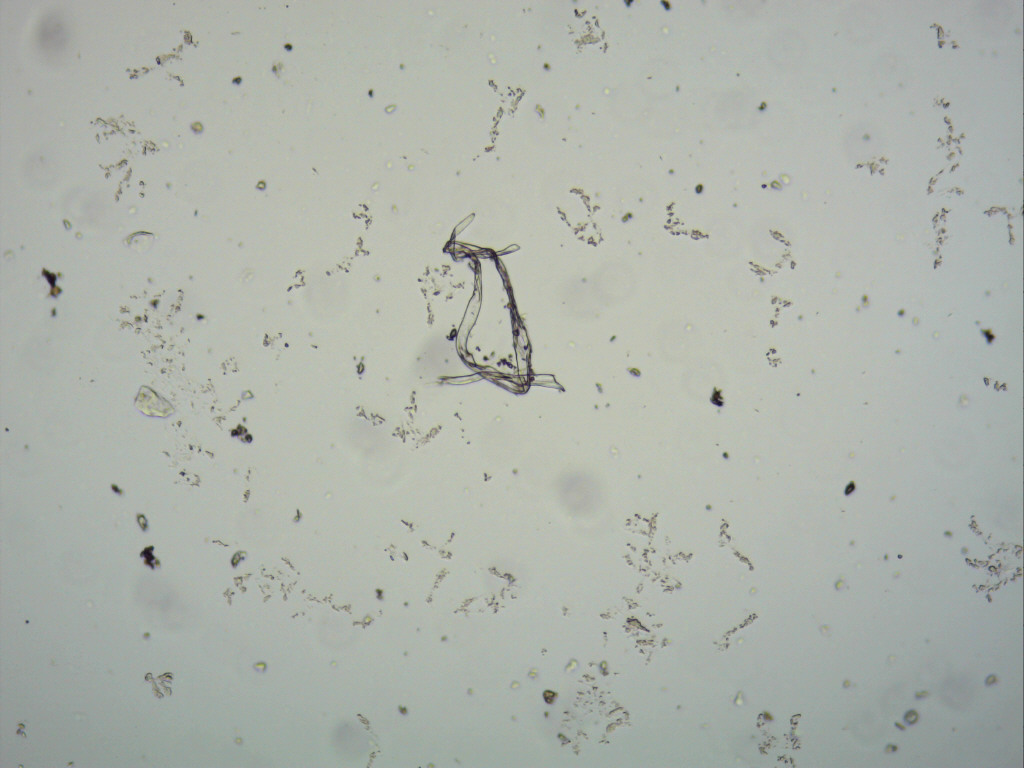

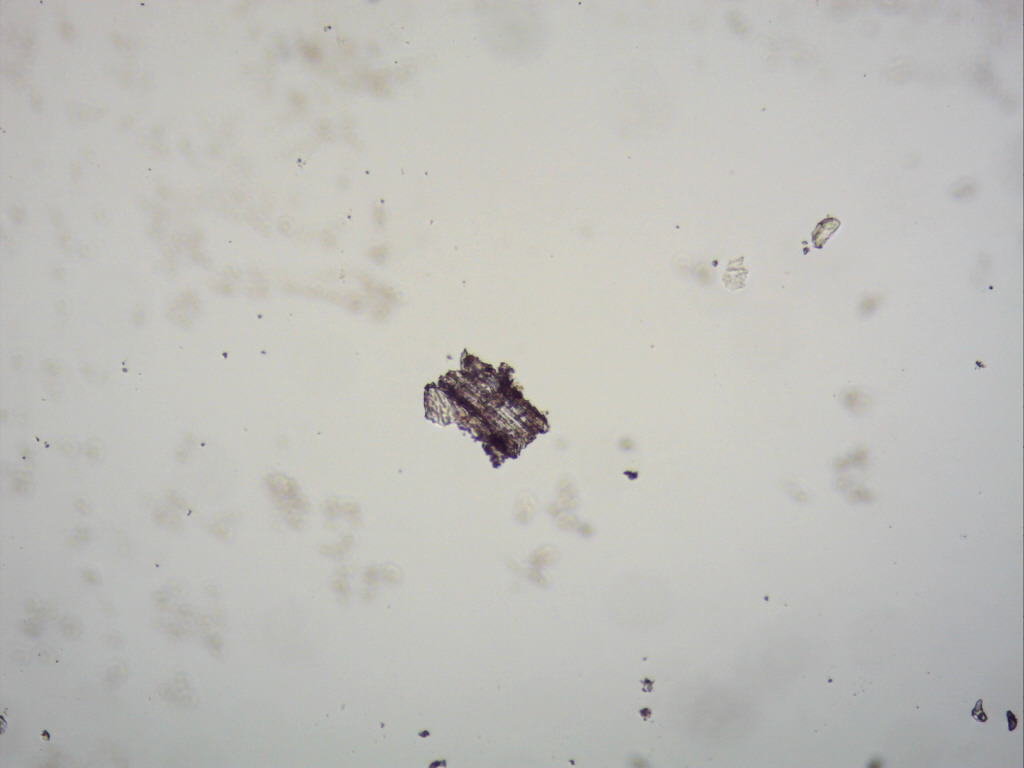

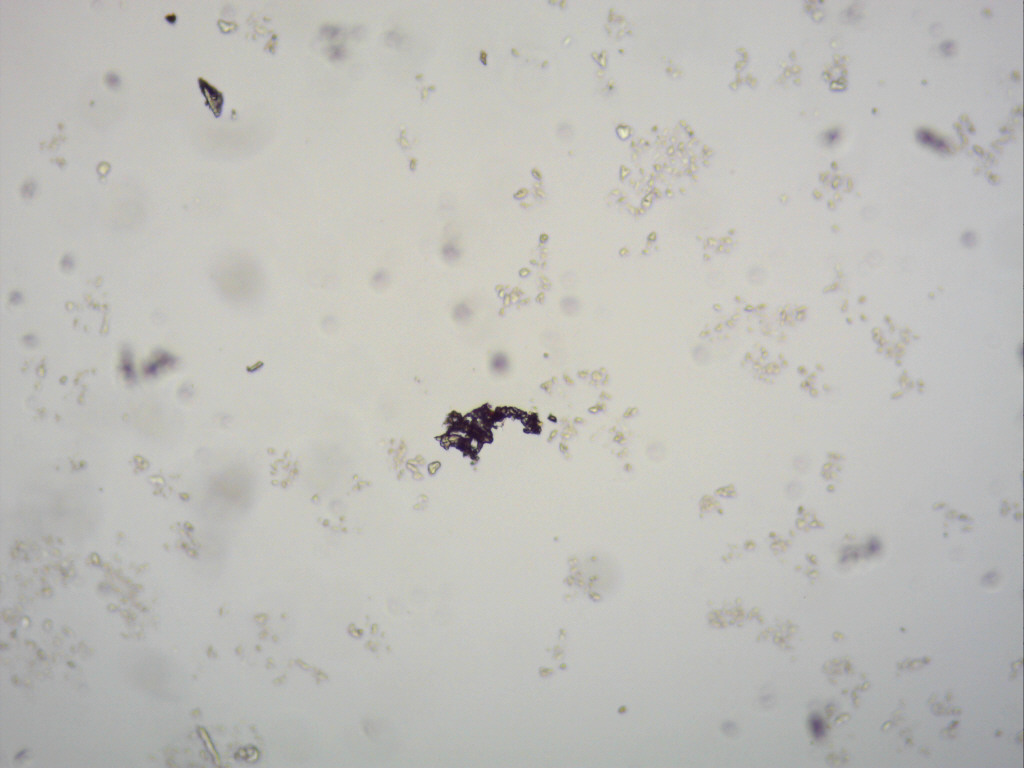


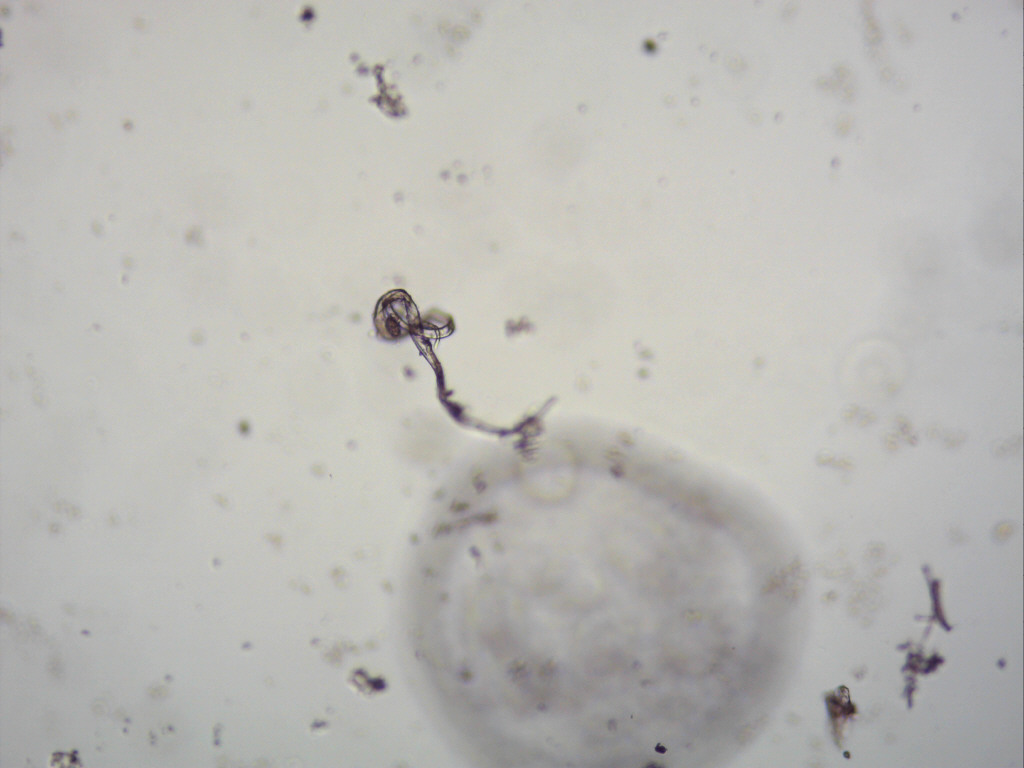

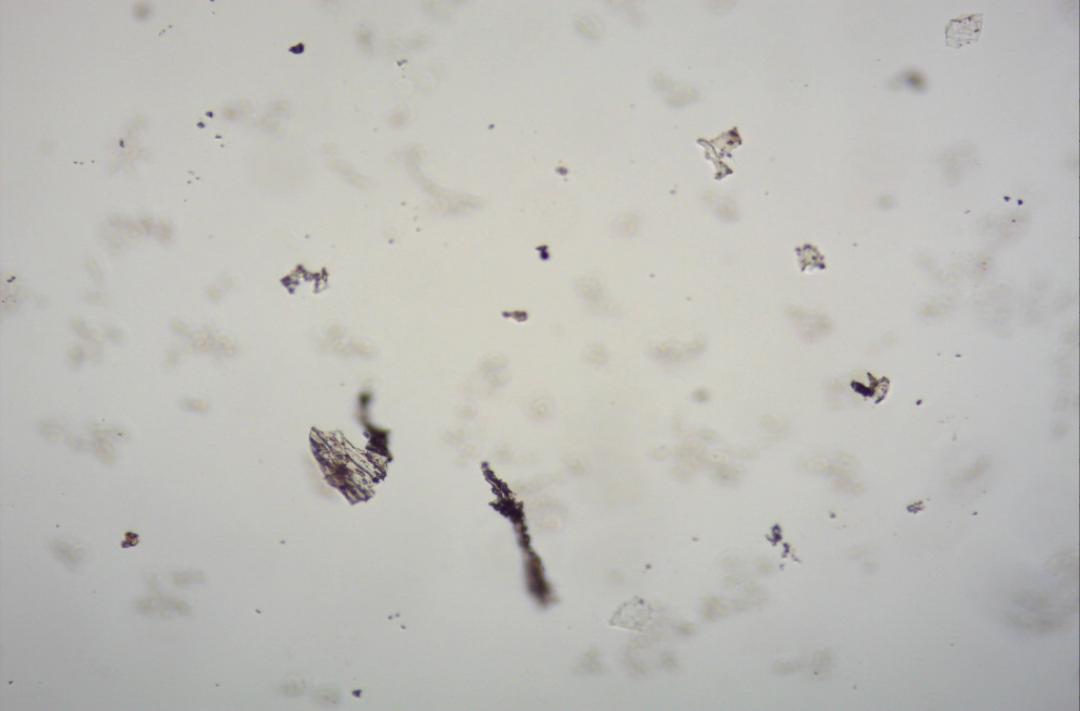

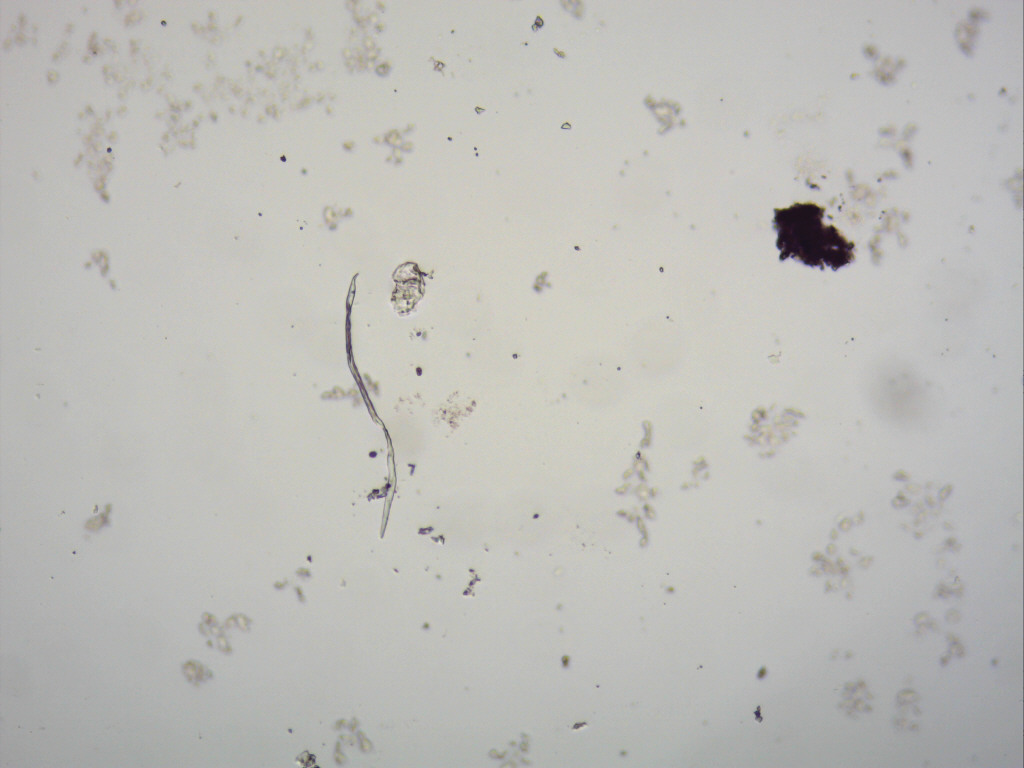


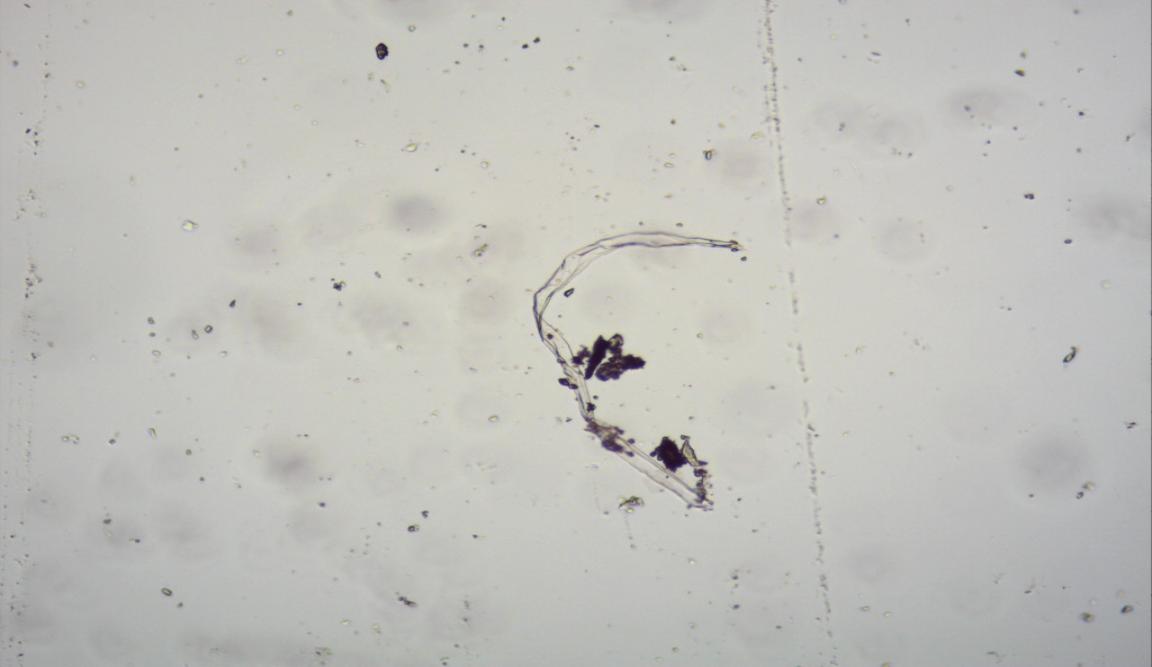

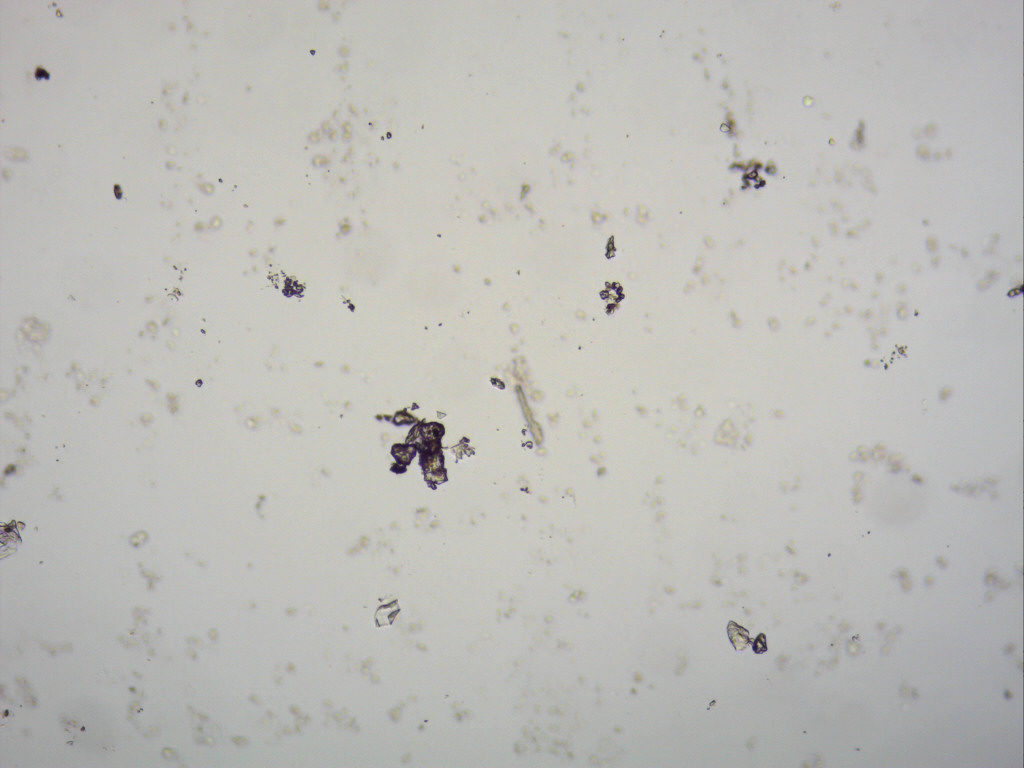

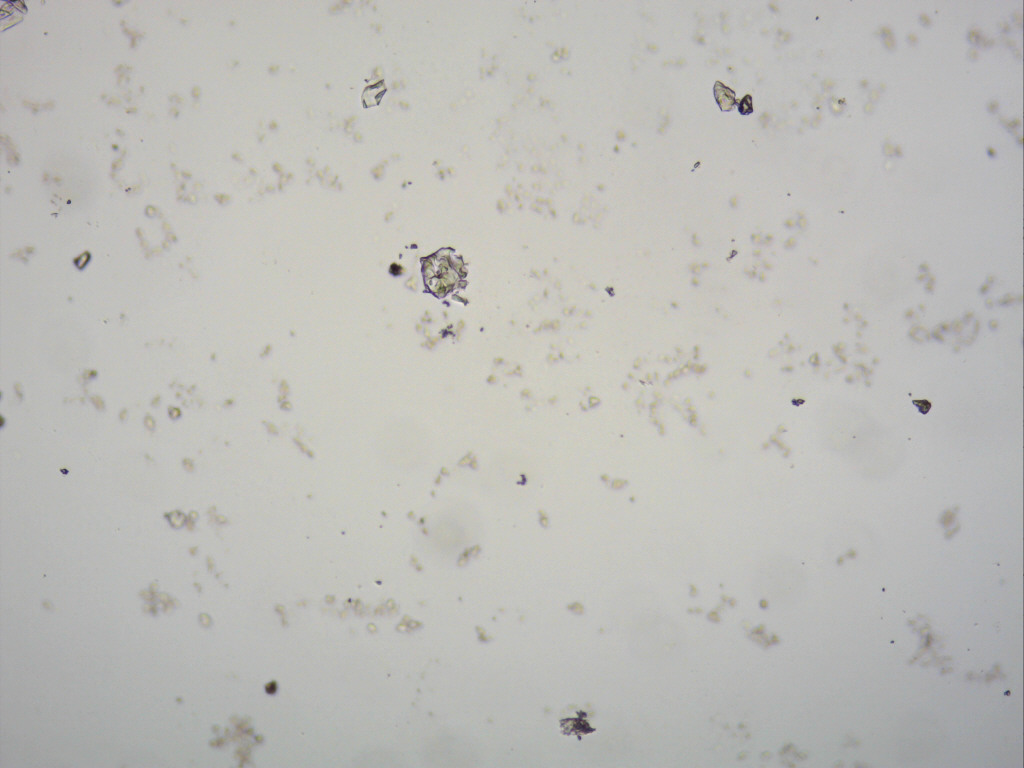


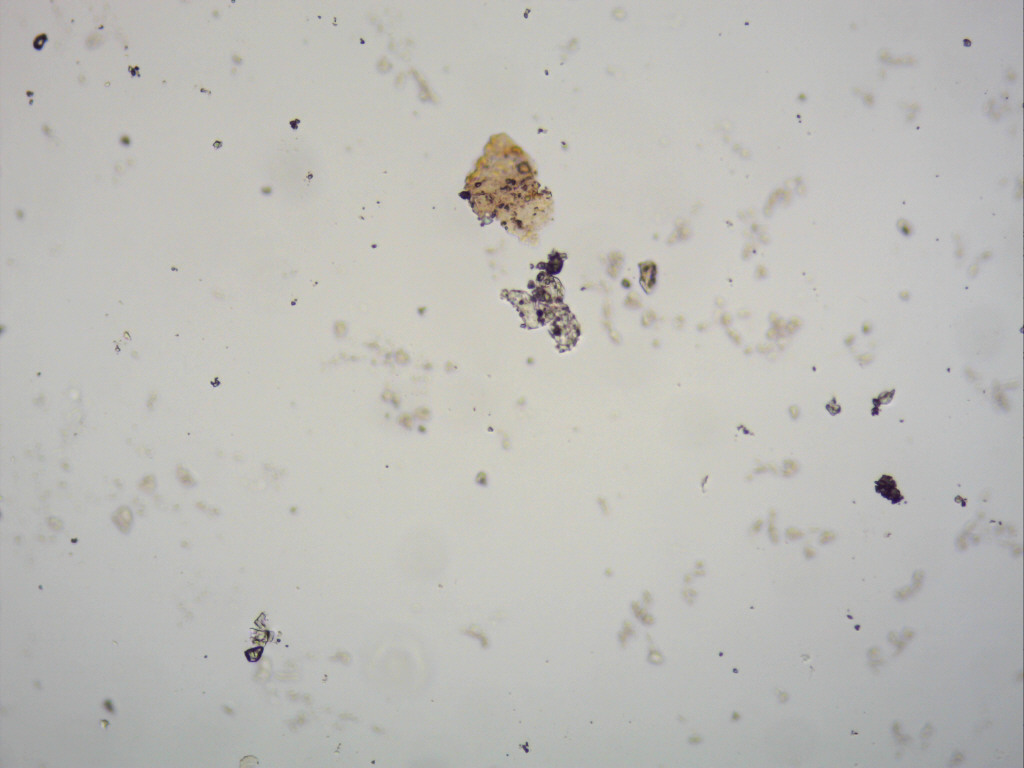

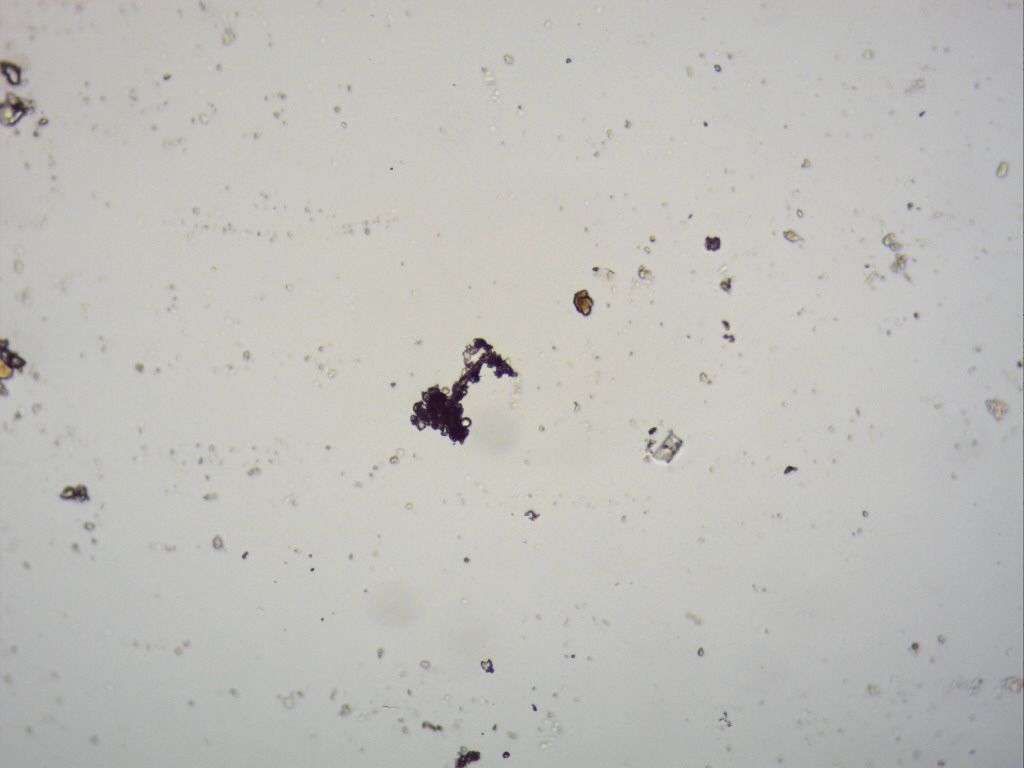

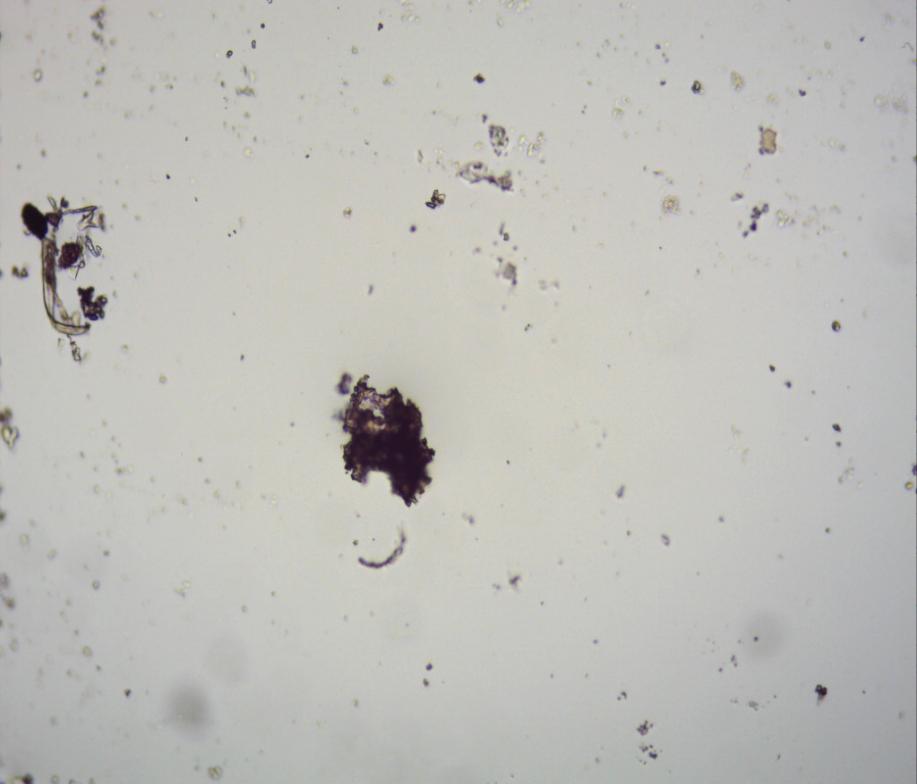


Figure S1: Microscope images of PU microplastic surface morphology


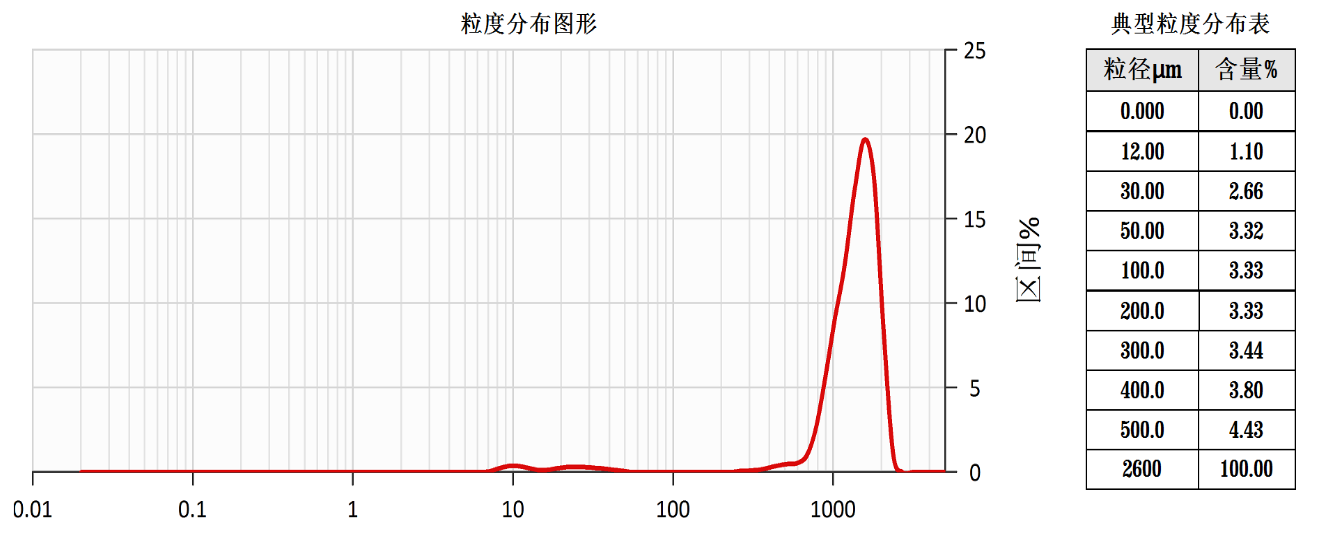


Figure S2: Particle size distribution distribution of plastic particles

Table S1 Particle size distribution of plastic particles

| Size (μm) | 0.000 | 12.00 | 30.00 | 50.00 | 100.00 | 200.00 | 300.00 | 400.00 | 500.00 | 2600.00 |
| --- | --- | --- | --- | --- | --- | --- | --- | --- | --- | --- |
| Percent (%) | 0.00 | 1.10 | 2.66 | 3.32 | 3.33 | 3.33 | 3.44 | 3.80 | 4.43 | 100.00 |

Table S2 Heavy metal concentrations in different samples (mg/kg)

| Content | MPs | | | EF | | | N-PV | | | P | | | F | | |
| --- | --- | --- | --- | --- | --- | --- | --- | --- | --- | --- | --- | --- | --- | --- | --- |
| 1 | 2 | 3 | 1 | 2 | 3 | 1 | 2 | 3 | 1 | 2 | 3 | 1 | 2 | 3 |
| As | 4.63 | 5.46 | 4.28 | 2.80 | 2.84 | 2.75 | 3.22 | 3.16 | 3.21 | 3.80 | 3.76 | 3.82 | 3.10 | 3.08 | 3.13 |
| Zn | 665.47 | 632.95 | 623.70 | 52.13 | 51.11 | 54.49 | 53.79 | 53.61 | 56.66 | 41.70 | 29.82 | 33.89 | 47.93 | 55.67 | 44.17 |
| Cu | 13.67 | 18.80 | 10.81 | 18.99 | 16.27 | 14.62 | 7.96 | 12.47 | 10.91 | 14.56 | 9.91 | 7.17 | 12.96 | 18.50 | 16.93 |
| Ni | 39.32 | 40.67 | 42.01 | 25.54 | 21.13 | 29.95 | 17.44 | 17.75 | 17.13 | 28.83 | 23.35 | 29.88 | 21.75 | 16.37 | 19.32 |
| Co | 6.92 | 7.30 | 7.23 | 10.12 | 8.69 | 9.63 | 9.13 | 9.12 | 8.12 | 7.85 | 7.87 | 7.42 | 9.09 | 9.09 | 8.86 |
| Mn | 207.98 | 174.51 | 215.03 | 468.36 | 402.80 | 467.59 | 514.09 | 441.58 | 474.45 | 449.53 | 442.03 | 434.53 | 450.55 | 472.99 | 431.90 |
| Cr | 91.54 | 95.72 | 97.07 | 79.54 | 75.57 | 76.57 | 92.87 | 94.67 | 91.08 | 70.42 | 57.70 | 80.82 | 74.77 | 68.88 | 60.29 |
| Pb | 19.73 | 18.80 | 17.87 | 19.13 | 18.61 | 16.54 | 28.57 | 26.43 | 26.90 | 16.40 | 21.72 | 19.01 | 16.75 | 18.34 | 19.71 |
| Cd | 0.12 | 0.11 | 0.13 | 0.12 | 0.09 | 0.11 | 0.13 | 0.11 | 0.10 | 0.10 | 0.10 | 0.11 | 0.11 | 0.10 | 0.10 |

Table S3 PCA feature vectors for every indicator

| Loadings | PC1 | PC2 | PC3 | PC4 | PC5 |
| --- | --- | --- | --- | --- | --- |
| As | 0.404 | 0.025 | -0.261 | -0.292 | 0.151 |
| Zn | 0.405 | -0.076 | 0.209 | -0.330 | -0.202 |
| Cu | -0.026 | -0.575 | 0.525 | -0.164 | -0.327 |
| Ni | 0.396 | -0.202 | -0.050 | 0.362 | 0.462 |
| Co | -0.364 | -0.084 | 0.486 | 0.197 | 0.353 |
| Mn | -0.408 | 0.143 | -0.126 | 0.238 | -0.036 |
| Cr | 0.262 | 0.389 | 0.539 | -0.036 | 0.422 |
| Pb | -0.072 | 0.649 | 0.218 | -0.231 | -0.258 |
| Cd | 0.377 | 0.153 | 0.143 | 0.705 | -0.495 |


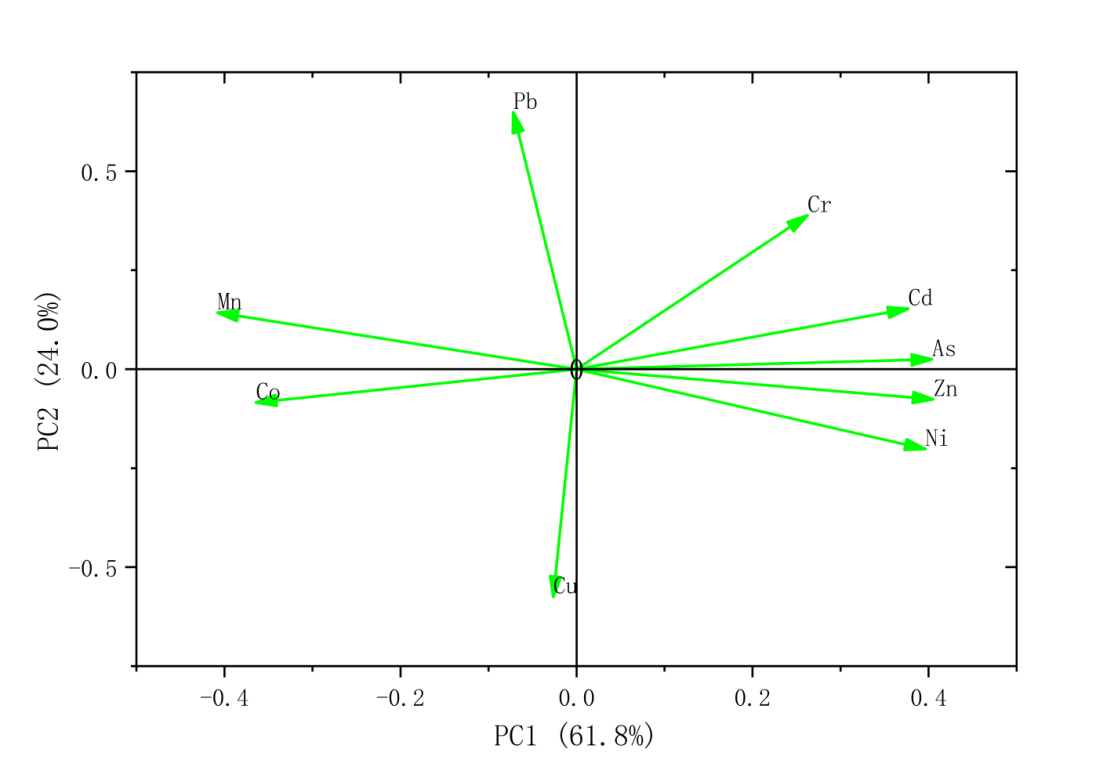


Figure S3: load diagram of PCA feature vectors

Table S4 Single factor pollution indices of various metals among five types of soil

|  | MPs | EF | N-PV | P | F |
| --- | --- | --- | --- | --- | --- |
| As | 0.0799 | 0.0932 | 0.0533 | 0.0632 | 0.1034 |
| Cu | 0.0008 | 0.1663 | 0.0006 | 0.0006 | 0.1613 |
| Ni | 0.0452 | 0.2554 | 0.0194 | 0.0304 | 0.1915 |
| Pb | 0.0235 | 0.1508 | 0.0341 | 0.0238 | 0.1522 |
| Cd | 0.0018 | 0.3559 | 0.0018 | 0.0016 | 0.3441 |
| Co | 0.1021 | 0 | 0.1256 | 0.1101 | 0 |
| Zn | 0 | 0.2103 | 0 | 0 | 0.1970 |
| Cr | 0 | 0.3861 | 0 | 0 | 0.3399 |

Table S5 Cumulative index of different heavy metalsof soil

|  | MPs | EF | N-PV | P | F |
| --- | --- | --- | --- | --- | --- |
| As | 0.49 | 0.29 | 0.33 | 0.39 | 0.32 |
| Zn | 10.25 | 0.84 | 0.87 | 0.56 | 0.79 |
| Cu | 0.72 | 0.83 | 0.52 | 0.53 | 0.81 |
| Ni | 1.48 | 0.93 | 0.64 | 1.00 | 0.70 |
| Co | 0.62 | 0.82 | 0.76 | 0.67 | 0.78 |
| Mn | 0.35 | 0.79 | 0.84 | 0.78 | 0.80 |
| Cr | 1.50 | 1.22 | 1.47 | 1.10 | 1.08 |
| Pb | 0.84 | 0.81 | 1.22 | 0.85 | 0.82 |
| Cd | 1.83 | 1.64 | 1.76 | 1.64 | 1.59 |


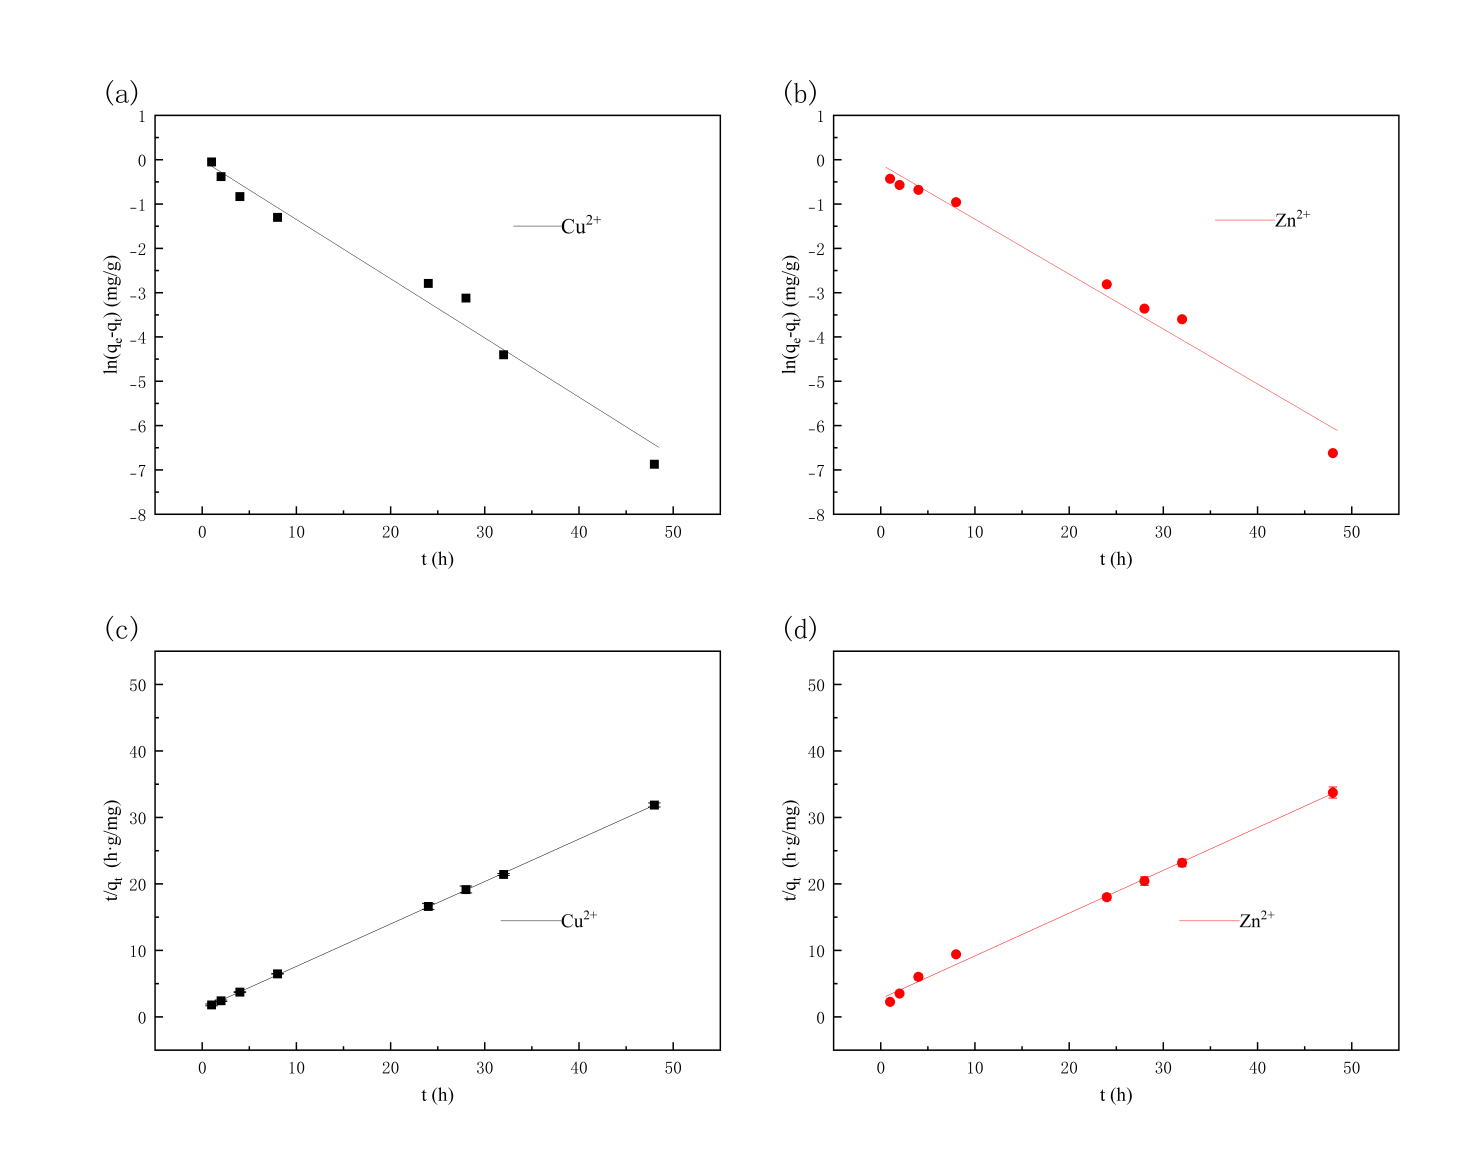


Figure S4 Dynamic equation fitting diagram of microplastics in single system (a: quasi-first-order adsorption kinetics fitting diagram of Cu2+; b: quasi-first-order adsorption kinetics fitting diagram of Zn2+; c: quasi-second-order adsorption kinetics fitting diagram of Cu2+; d: quasi-second-order adsorption kinetics fitting diagram of Zn2+)

Table S6 Adsorption capacities qt (mg/g) of Cu²⁺ and Zn²⁺ of microplastics in single and binary system

| Single system | | | | | | | | | | | | | | |
| --- | --- | --- | --- | --- | --- | --- | --- | --- | --- | --- | --- | --- | --- | --- |
| Time | Cu²⁺ | | | | | Zn²⁺ | | | | | | | |
| (h) | qt 1 | qt 2 | qt 3 | Mean | SD | qt 1 | | qt 2 | | qt 3 | | Mean | SD |
| 1 | 0.599 | 0.550 | 0.514 | 0.554 | 0.043 | 0.292 | | 0.286 | | 0.308 | | 0.295 | 0.011 |
| 2 | 0.817 | 0.858 | 0.788 | 0.821 | 0.035 | 0.403 | | 0.380 | | 0.361 | | 0.381 | 0.021 |
| 4 | 1.063 | 1.063 | 1.087 | 1.071 | 0.014 | 0.435 | | 0.481 | | 0.418 | | 0.445 | 0.033 |
| 8 | 1.240 | 1.233 | 1.229 | 1.234 | 0.006 | 0.556 | | 0.575 | | 0.568 | | 0.566 | 0.010 |
| 24 | 1.446 | 1.482 | 1.404 | 1.444 | 0.039 | 0.867 | | 0.914 | | 0.885 | | 0.889 | 0.024 |
| 28 | 1.475 | 1.491 | 1.419 | 1.462 | 0.038 | 0.881 | | 0.927 | | 0.934 | | 0.914 | 0.029 |
| 32 | 1.504 | 1.494 | 1.483 | 1.494 | 0.011 | 0.915 | | 0.901 | | 0.948 | | 0.921 | 0.024 |
| 48 | 1.522 | 1.502 | 1.494 | 1.506 | 0.014 | 0.930 | | 0.941 | | 0.975 | | 0.949 | 0.023 |
| Binary system | | | | | | | | | | | | | | |
| Time | Cu²⁺ | | | | | Zn²⁺ | | | | | | | | |
| (h) | qt 1 | qt 2 | qt 3 | Mean | SD | qt 1 | qt 2 | | qt 3 | | Mean | | SD | |
| 1 | 0.373 | 0.391 | 0.415 | 0.393 | 0.021 | 0.149 | 0.158 | | 0.164 | | 0.157 | | 0.008 | |
| 2 | 0.659 | 0.621 | 0.641 | 0.640 | 0.019 | 0.161 | 0.200 | | 0.220 | | 0.194 | | 0.030 | |
| 4 | 0.788 | 0.815 | 0.805 | 0.803 | 0.014 | 0.290 | 0.253 | | 0.286 | | 0.276 | | 0.020 | |
| 8 | 1.053 | 1.027 | 1.022 | 1.034 | 0.017 | 0.382 | 0.366 | | 0.362 | | 0.370 | | 0.011 | |
| 24 | 1.184 | 1.210 | 1.190 | 1.195 | 0.014 | 0.691 | 0.704 | | 0.725 | | 0.707 | | 0.017 | |
| 28 | 1.227 | 1.248 | 1.210 | 1.228 | 0.019 | 0.720 | 0.743 | | 0.734 | | 0.732 | | 0.012 | |
| 32 | 1.283 | 1.300 | 1.268 | 1.284 | 0.016 | 0.747 | 0.774 | | 0.746 | | 0.756 | | 0.016 | |
| 48 | 1.296 | 1.324 | 1.291 | 1.304 | 0.018 | 0.774 | 0.790 | | 0.762 | | 0.776 | | 0.014 | |

Figure S5 The fitting diagram of the dynamic model of microplastics in a binary system (a:quasi-first-order adsorption kinetics fitting diagram of Cu2+ ;b: quasi-first-order adsorption kinetics fitting diagram of Zn2+ ;C. quasi-second-order adsorption kinetics fitting diagram of Cu2+;d: quasi-second-order adsorption kinetics fitting diagram of Zn2+.)

Table S7 Isothermal adsorption capacities of microplastics during the adsorption process in binary system

| Cu²⁺ | | | | | | Zn²⁺ | | | | | |
| --- | --- | --- | --- | --- | --- | --- | --- | --- | --- | --- | --- |
| 15℃ | | 25℃ | | 35℃ | | 15℃ | | 25℃ | | 35℃ | |
| Ce (mg/L) | qe (mg/g) | Ce (mg/L) | qe (mg/g) | Ce (mg/L) | qe (mg/g) | Ce (mg/L) | qe (mg/g) | Ce (mg/L) | qe (mg/g) | Ce (mg/L) | qe (mg/g) |
| 0.587 | 0.085 | 0.58 | 0.085 | 0.389 | 0.097 | 0.534 | 0.088 | 0.606 | 0.084 | 0.502 | 0.094 |
| 1.259 | 0.164 | 1.419 | 0.155 | 0.904 | 0.186 | 1.36 | 0.158 | 1.552 | 0.147 | 1.86 | 0.132 |
| 3.208 | 0.288 | 2.822 | 0.311 | 2.154 | 0.351 | 3.288 | 0.283 | 3.635 | 0.262 | 3.872 | 0.251 |
| 7.624 | 0.503 | 5.772 | 0.614 | 4.148 | 0.711 | 8.128 | 0.472 | 8.098 | 0.474 | 9.808 | 0.375 |
| 24.384 | 0.457 | 10.776 | 1.273 | 9.88 | 1.327 | 20.512 | 0.689 | 20.362 | 0.698 | 25.133 | 0.412 |
| 51.968 | 0.722 | 28.928 | 2.104 | 19.376 | 2.677 | 40.256 | 1.425 | 47.837 | 0.97 | 52.416 | 0.695 |
| 111.296 | 1.002 | 79.136 | 2.932 | 42.592 | 5.124 | 80.256 | 2.865 | 103.6 | 1.464 | 107.626 | 1.226 |

Figure S6 Adsorption isotherm fitting diagram of microplastics in the binary system (a:Cu2+ Fruendlich model fitting graph;b: Zn2+ Fruendlich model fitting graph;c: Cu2+ Langmuir model fitting graph;d: Zn2+ Langmuir model fitting diagram).

Figure S7 Fitting diagram of adsorption thermodynamic equation

### **Risk assessment models**

In this study, three exposure pathways considered: oral ingestion, dermal contact, and inhalation. The total carcinogenic risk and hazard index of a single pollutant through the aforementioned three pathways is calculated using the following formula:

（S1）

（S2）

1. Oral intake:

（S3）

（S4）

Where And refer to the orally ingested soil exposure levels (carcinogenic effect and non carcinogenic effect) (kgsoil/(kgweight d-1). According to the appendix recommended value, (mg·d-1)=100, EDa (a)=25, EFa (d·a-1)=250, BWa (kg)=61.8, ABSo=1, ATca (d)=27740, ATnc (d)=9125.

Substituting the aforementioned parameters, =3.6×10-7 (kgsoil/(kgweight d-1) and =1.1×10-6 (kgsoil/(kgweight d-1).

（S5）

（S6）

Where SFo is oral intake carcinogenicity slope factor. Due to the high levels of arsenic exposure and its easy accessibility, recommended value of 1.5 is assigned to the arsenic intake carcinogenicity slope factor. RfDo is the reference dose for oral intake, with different recommended values for various metals.

1. Dermal contact

（S7）

（S8）

（S9）

Where DCSERca and DCSERnc refer to the soil exposure dose via skin contact (carcinogenic effect and non carcinogenic effect) (kgsoil/(kgweight d-1). According to the appendix recommended value, SAEa is adult exposed skin surface area, SSARa (mg·cm-2) = 0.2; Ha (cm) =161.5, SERa = 0.18, and then the calculated SAEa (cm²) = 3022.87. ABSd is the akin contact absorption efficiency factor, equals 0.03 of arsenic and 0.001 of cadmium. Ev (event/d) =1.

Calculation based on the data yields the following skin contact carcinogenic effects: (kgsoil/(kgweight d-1): arsenic = 6.6×10-8, cadmium=2.2×10-9; arsenic =2.0×10-7; cadmium =6.7×10-9.

（S10）

（S11）

Where SFd is the skin contact carcinogenicity slope factor and the recommended value is 1.5.

1. Inhalation

（S12）

（S13）

Where PISERca and refer to the soil exposure dose via skin contact (carcinogenic effect and non carcinogenic effect) (kgsoil/(kgweight d-1). According to the appendix recommended value, PM10 (mg·m -3) =0.119, DAIRa (m3 ·d-1)= 14.5, PIAF =0.75, fspi =0.8, fspo =0.5, EFIa (d·a-1) =187.5, EFOa (d·a-1) =62.5. Then DCSERca =3.4E-09, and DCSERnc =1.04E-08.

（S14）

（S15）
